# Supplementary material
Source: publisher figshare collection journal article supplement (https://frontiersin.figshare.com/ndownloader/files/14634713)
Supplement: Supplementary file [file 14634713]

(A)

(B)

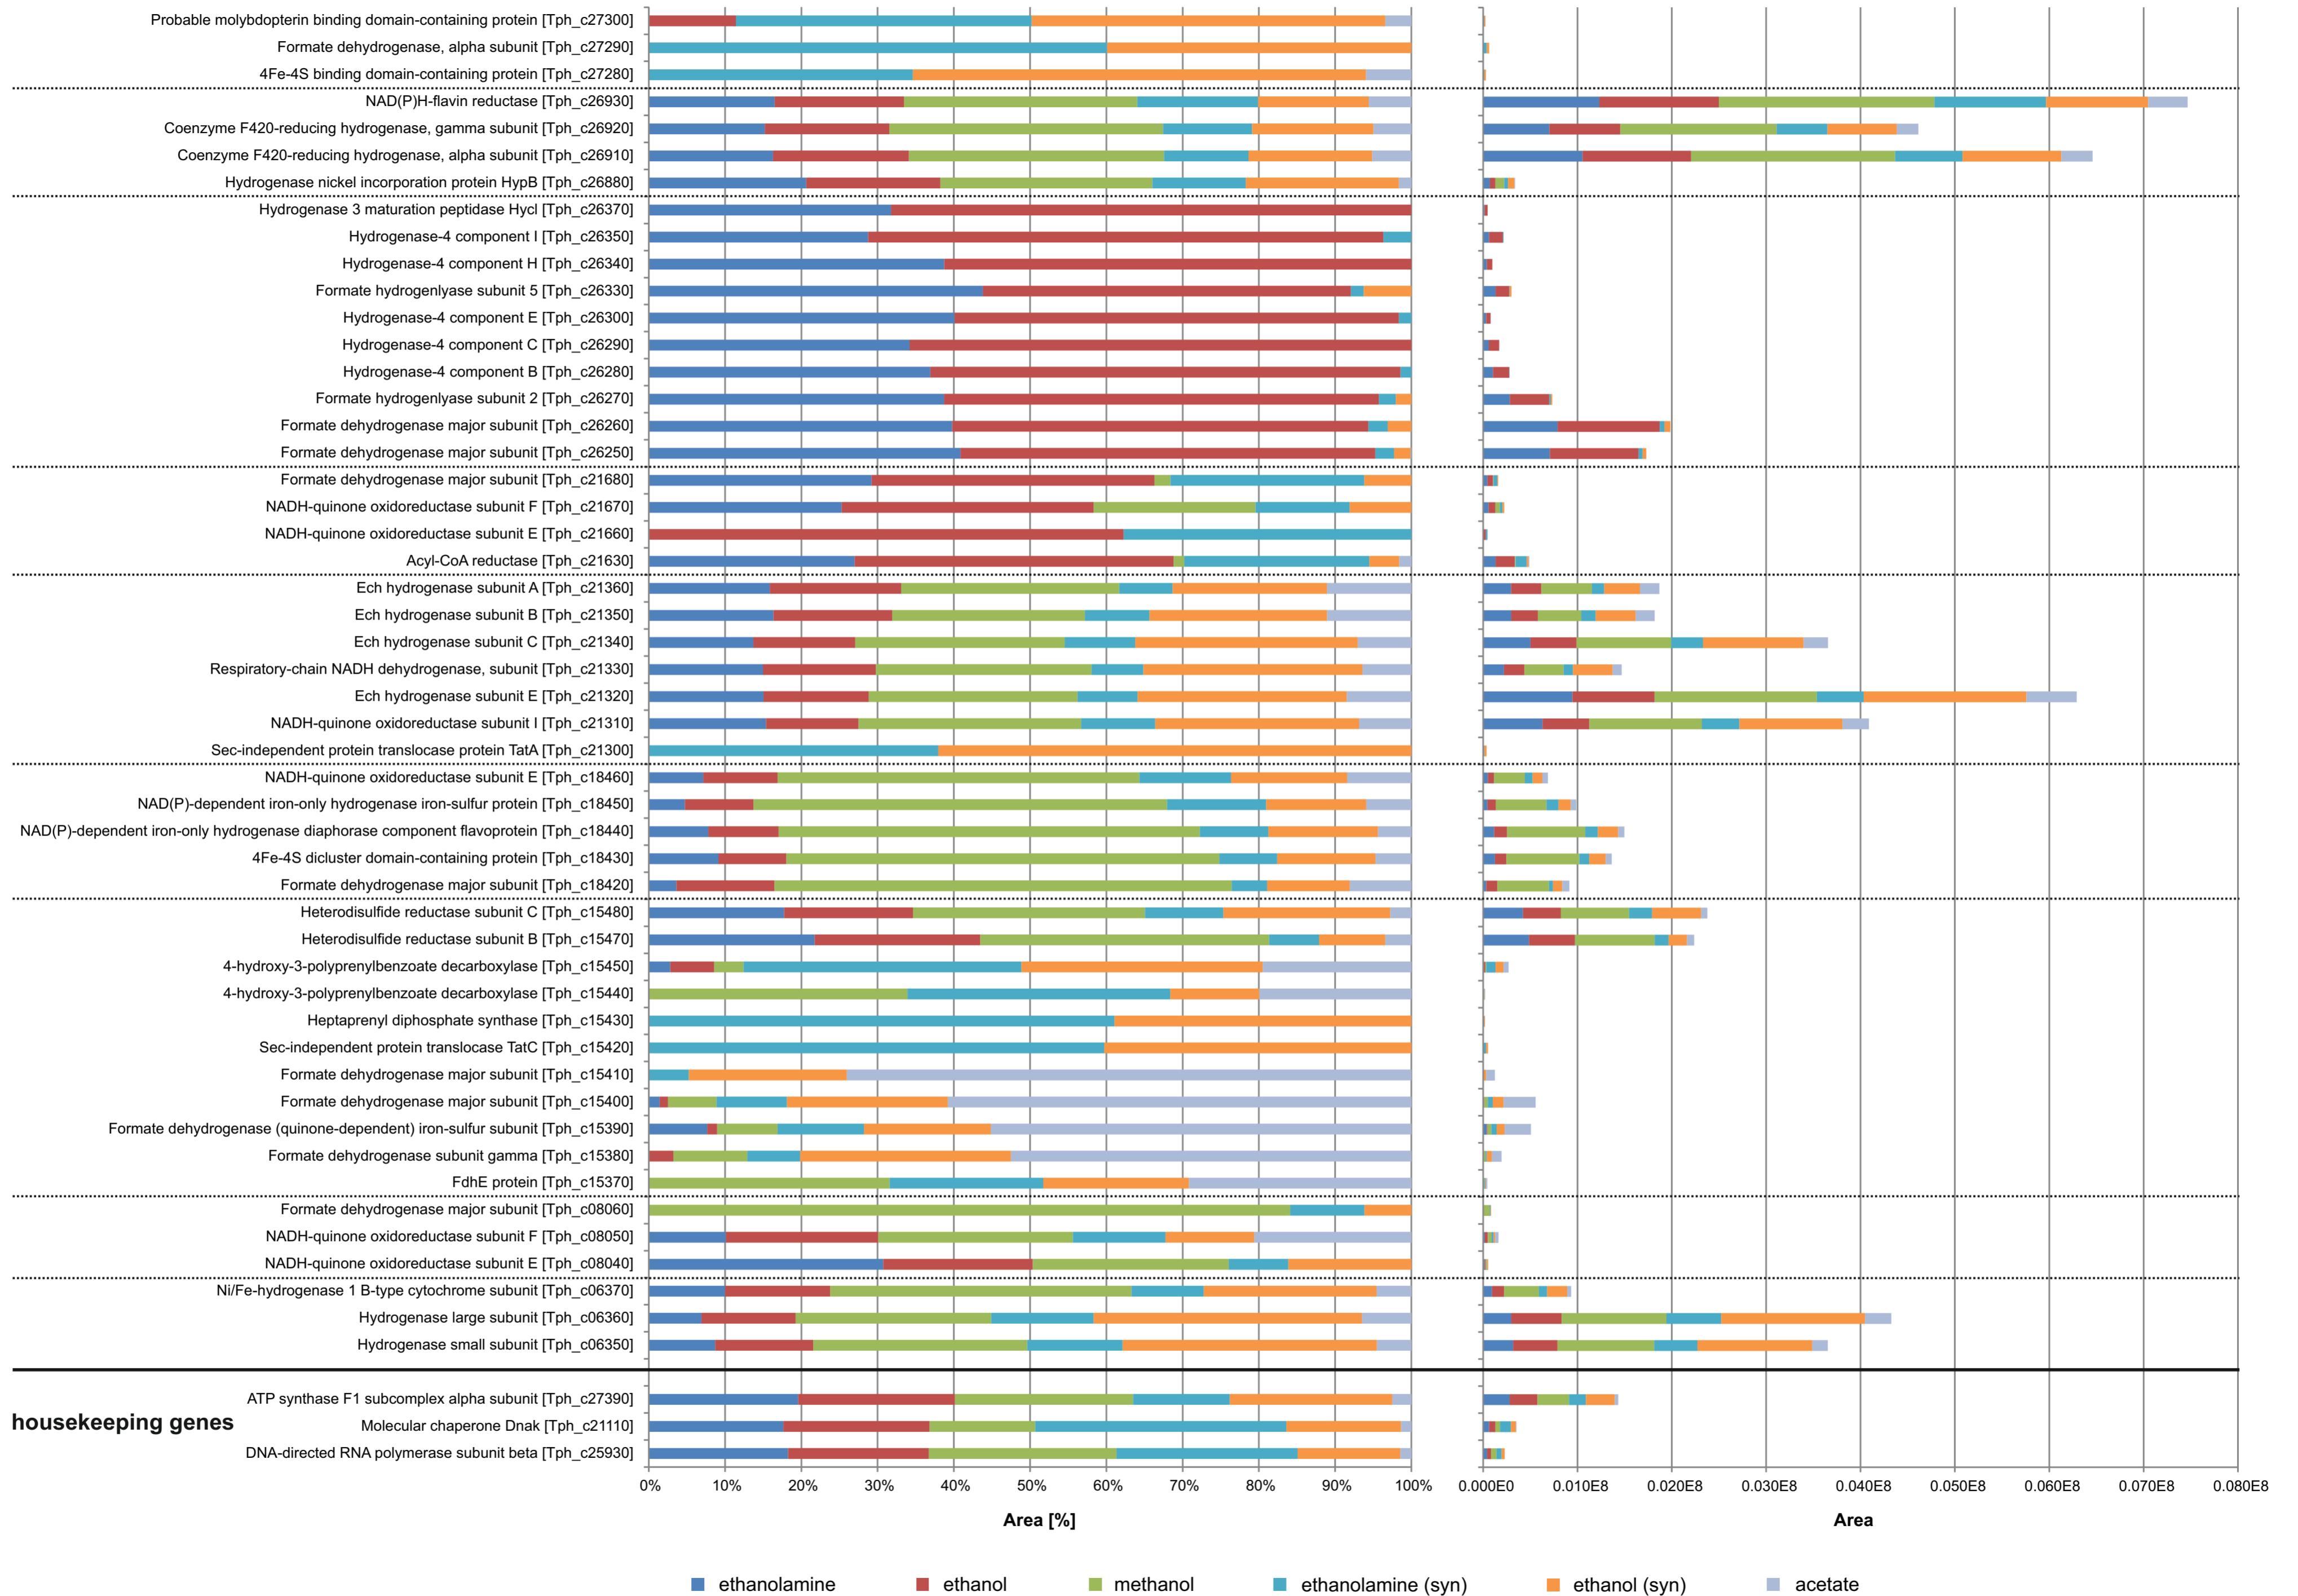

Supplementary Figure 3: Proteome data of all expressed hydrogenases and formate dehydrogenases obtained during growth of *Thermacetogenium phaeum* with different substrates. All expressed genes of the different gene clusters are shown in the graph. The clusters were separated by dashed lines. Housekeeping genes were depicted beneath the solid line. **(A)**: normalized data: percentage of protein abundances (expressed as area of mass spectroscopy signals) under various growth conditions relative to the summed protein abundances (area) of all growth conditions. **(B)**: absolute sums of area values of the respective identified proteins obtained in all growth conditions are shown here.
